# Supplementary material
Source: MDPI journal article supplement (https://www.mdpi.com/2073-4344/10/2/263)
Supplement: s1 [file s1]

# Electrochemical Oxidation of an Organic Dye Adsorbed on Tin Oxide and Antimony Doped Tin Oxide Graphene Composites

Farbod Sharif<sup>1</sup>, Edward P. L. Roberts<sup>1\*</sup>

<sup>1</sup> University of Calgary, Department of Chemical and Petroleum Engineering, 2500

University Drive NW, Calgary, AB T2N 1N4, Canada

\*Corresponding Author. Tel: 403 220-4466.

Email: [edward.roberts@ucalgary.ca](mailto:edward.roberts@ucalgary.ca) (Edward Roberts)

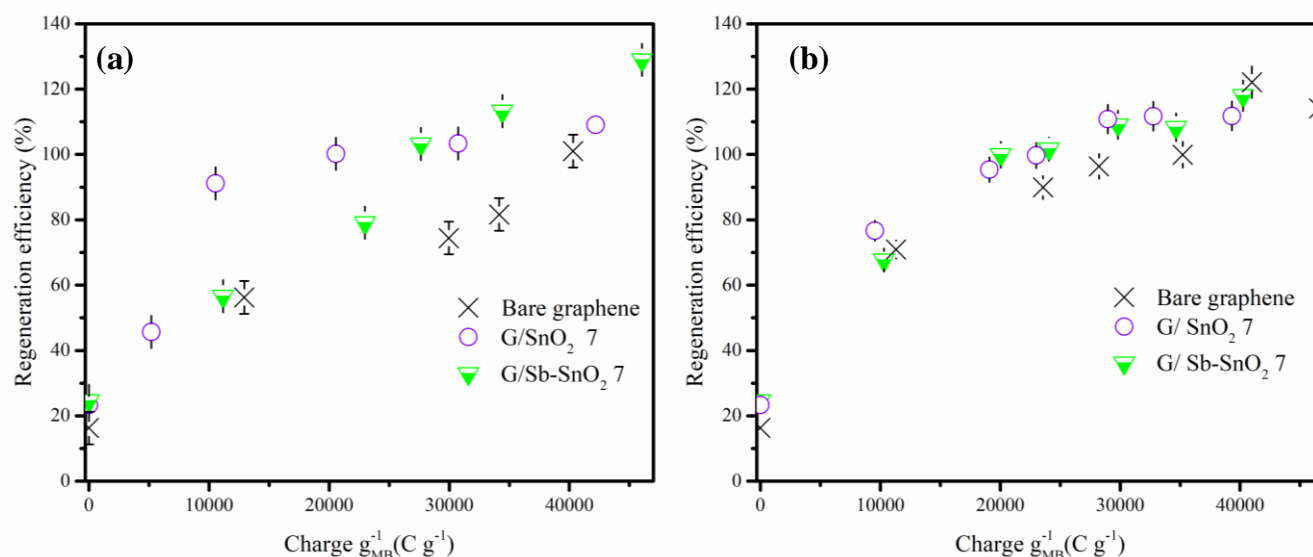

Figure S1. Effect of charge passed on regeneration efficiency of MB adsorption on bare graphene, G/SnO<sub>2</sub> 7 and G/Sb-SnO<sub>2</sub> 7, and (a) NaCl electrolyte and (b) Na<sub>2</sub>SO<sub>4</sub> electrolyte (current density of 10 mA cm<sup>-2</sup>)
